# Supplementary material for: Photodetachment–photoelectron spectroscopy of HS−·H2S and DS−·D2S: the transition states of the SH + H2S and SD + D2S reactions
Source: Royal Society of Chemistry journal article supplement (doi:10.1039/b925941d), 2010-01-01
Supplement: b925941d.pdf [file b925941d.pdf]

## Supporting information

The energies and corresponding geometry parameters of the fully optimized and the constraint anionic structure were calculated with Molpro at the RCCSD(T)/aug-cc-pVTZ level and are given in Table 1:

|                                                                                   |                 |                 |            |
|-----------------------------------------------------------------------------------|-----------------|-----------------|------------|
| 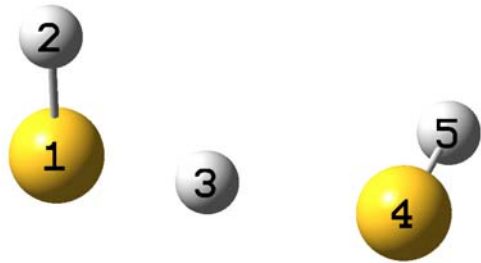 |                 | minimum         | constraint |
|                                                                                   | 1-3 [Å]         | 1.432           | 1.433      |
|                                                                                   | 1-4 [Å]         | 2.050           | 2.050      |
|                                                                                   | 1-2 [Å]         | 1.342           | 1.345      |
|                                                                                   | 4-5 [Å]         | 1.347           | 1.345      |
|                                                                                   | 1-4-3 [°]       | 0.2             | 0.0        |
|                                                                                   | 2-1-3 [°]       | 92.5            | 92.3       |
|                                                                                   | 3-4-5 [°]       | 90.7            | 92.3       |
|                                                                                   | 2-1-4-5 [°]*    | 89.4            | 89.4       |
| Energy [eV]                                                                       | -21696.62517248 | -21696.62517248 |            |

The ab-initio energies have been fitted with a polynomial of 8<sup>th</sup> order up to 6 eV with respect to the reference energy:

$$V(x) = a_0 + a_1 * x^2 + a_2 * x^4 + a_3 * x^6 + a_4 * x^8$$

The fitted parameters are listed in Table 2:

|                | anion    | neutral molecule |
|----------------|----------|------------------|
| a              | 0.0      | 3.37304          |
| a <sub>1</sub> | -2.27516 | -6.50658         |
| a <sub>2</sub> | 11.455   | 22.602           |
| a <sub>3</sub> | 3.53403  | -11.0417         |
| a <sub>4</sub> | 4.29274  | 11.6663          |

A standard deviation of  $5.3 \cdot 10^{-4}$  eV (17 points) for the anion potential and  $6.3 \cdot 10^{-3}$  eV (38 points) for the molecular potential were obtained.
